# Supplementary material for: Mitigation of Memory Impairment with Fermented Fucoidan and λ-Carrageenan Supplementation through Modulating the Gut Microbiota and Their Metagenome Function in Hippocampal Amyloid-β Infused Rats
Source: MDPI journal article supplement (doi:10.3390/cells11152301), 2022-07-26
Supplement: s1 [file s1]

Supplementary Figure S1. Molecular weight of fucoidan and lambda-carrageenan measured using Gel Permeation Chromatograph/Preparative Gel Permeation Chromatograph

- A. Chromatogram of fucoidan with no fermentation and its molecular size
- B. Chromatogram of fucoidan with *Luteolibacter algae* and its molecular size
- C. Chromatogram of lambda-carrageenan with no fermentation and its molecular size
- D. Chromatogram of lambda-carrageenan with *Pseudoalteromonas carrageenovora* and its molecular size

A.

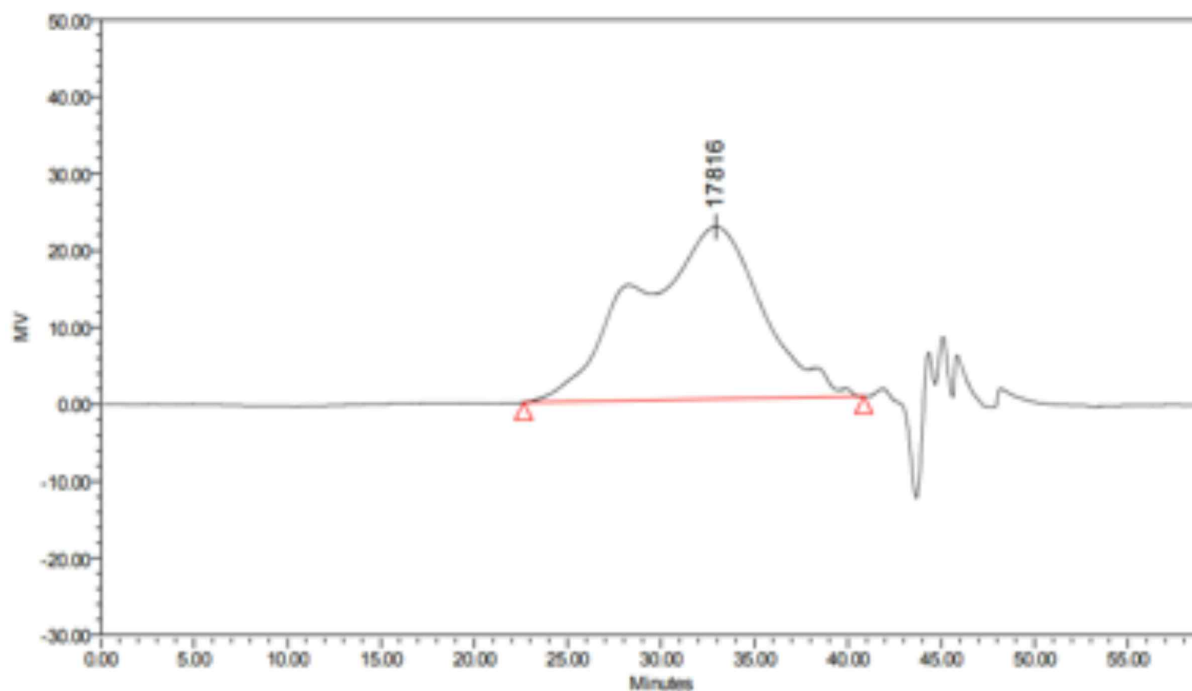

GPC Sample Results

|   | SampleName | Mn   | Mw    | MP    | Polydispersity | % Area |
|---|------------|------|-------|-------|----------------|--------|
| 1 | Sample 1   | 7750 | 88059 | 17816 | 11.479         | 100.00 |

B.

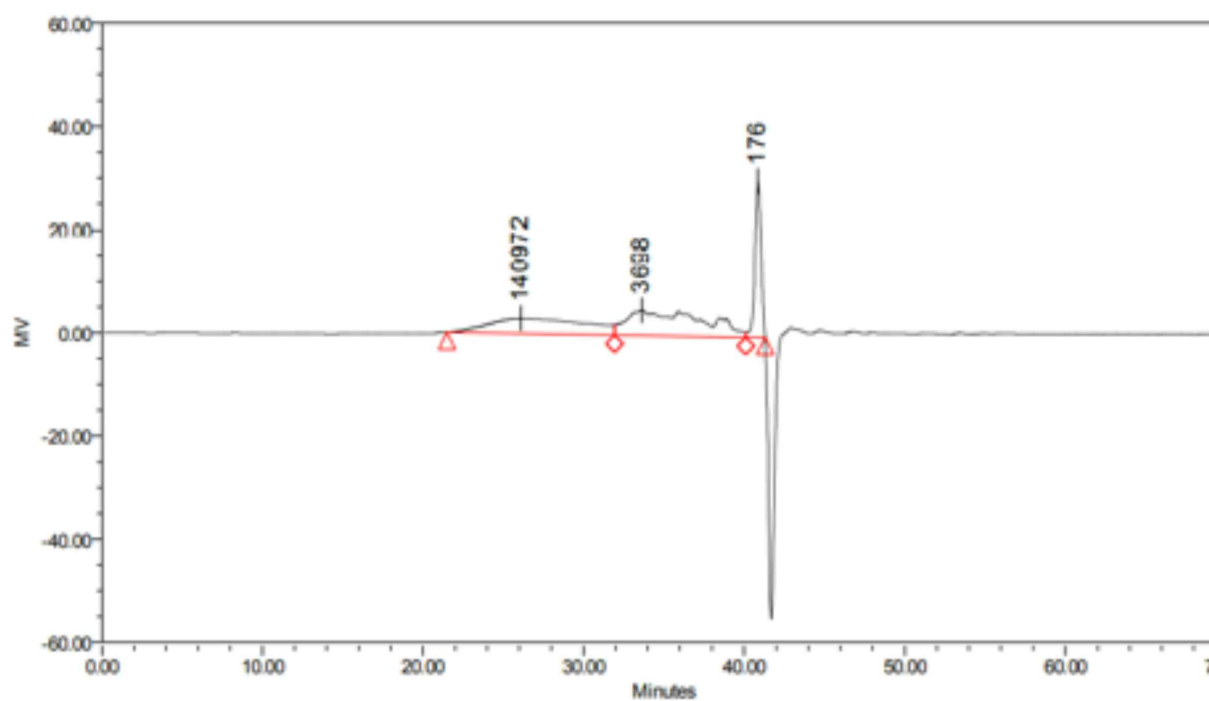

GPC Sample Results

|   | SampleName | Mn    | Mw     | MP     | Polydispersity | % Area |
|---|------------|-------|--------|--------|----------------|--------|
| 1 | Sample 6   | 39296 | 139315 | 140972 | 3.545          | 34.20  |
| 2 | Sample 6   | 1014  | 2260   | 3698   | 2.227          | 43.65  |
| 3 | Sample 6   | 177   | 178    | 176    | 1.005          | 22.14  |

C.

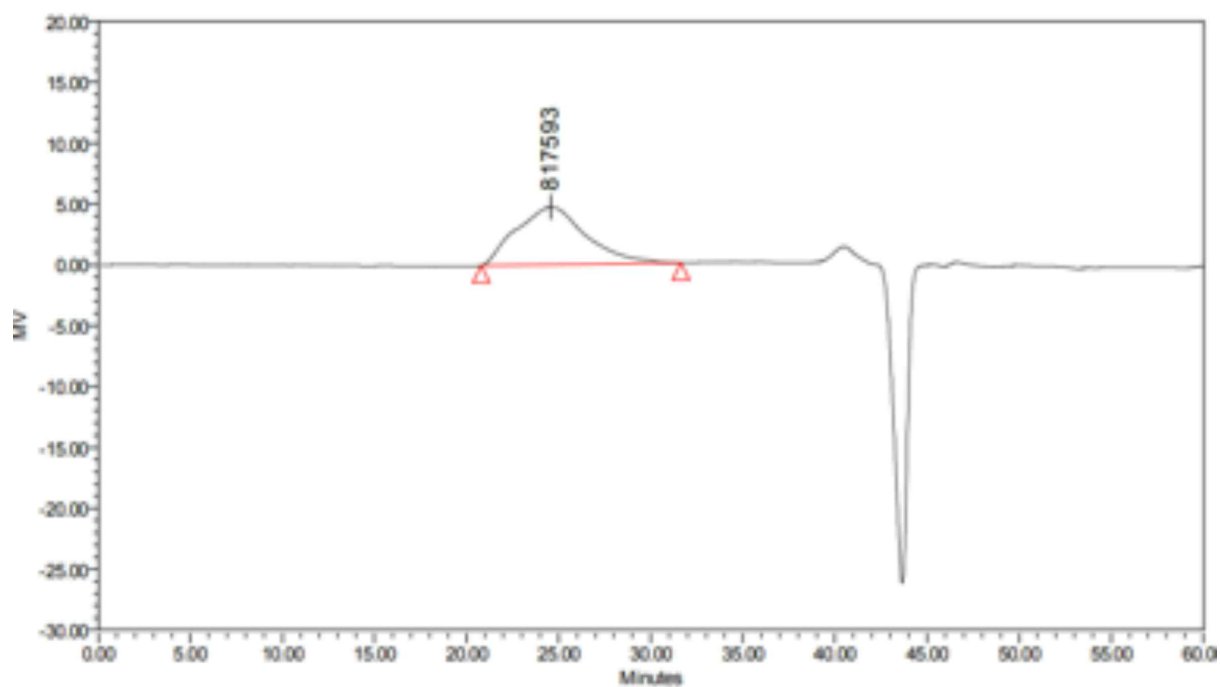

GPC Sample Results

|   | SampleName | Mn     | Mw     | MP     | Polydispersity | % Area |
|---|------------|--------|--------|--------|----------------|--------|
| 1 | Sample 2   | 529651 | 974600 | 817593 | 1.840          | 100.00 |

D.

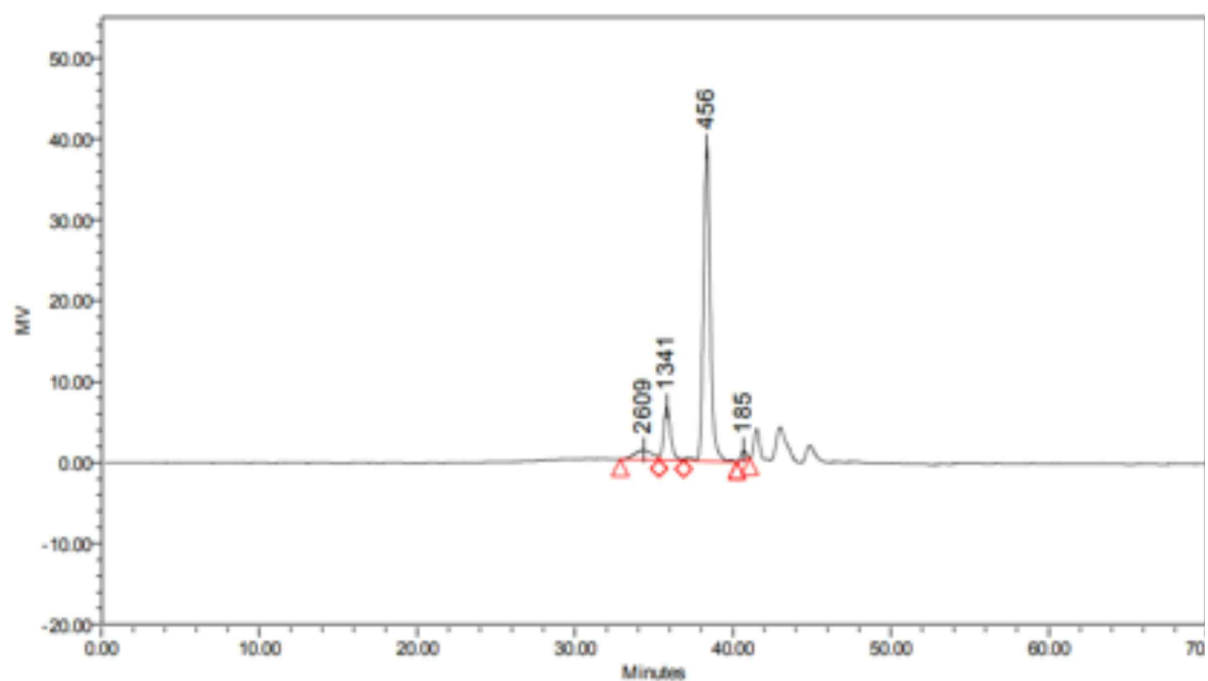

GPC Sample Results

|   | SampleName | Mn   | Mw   | MP   | Polydispersity | % Area |
|---|------------|------|------|------|----------------|--------|
| 1 | C-late     | 2542 | 2672 | 2609 | 1.051          | 6.11   |
| 2 | C-late     | 1303 | 1319 | 1341 | 1.012          | 13.68  |
| 3 | C-late     | 449  | 456  | 456  | 1.013          | 78.38  |
| 4 | C-late     | 185  | 185  | 185  | 1.003          | 1.83   |
